# Supplementary material for: A Genome-Wide Association Study Identifies rs2000999 as a Strong Genetic Determinant of Circulating Haptoglobin Levels
Source: PLoS One. 2012 Mar 5;7(3):e32327. doi: 10.1371/journal.pone.0032327 (PMC3293812; doi:10.1371/journal.pone.0032327)
Supplement: Table S1 — Conditional regression within the recombination hotspot around rs2000999. UNADJ: unadjusted p-values, SNP: single nucleotide polymorphism, add: additive model. (XLS) [file pone.0032327.s003.xls]

## Sheet: add
Unconditionned p-values		unadjusted p-values conditional on SNPs …
UNADJ	SNP	rs2000999	rs4788597	rs10492825	rs8060878	rs3764310	rs2335712	rs12918956	rs12928056	rs3213422	rs9932951	rs12926250	rs7195958	rs3852784	rs3909541	rs2023929	rs3764312	rs11864453	rs10492814	rs3852786	rs4788606	rs4238964	rs811047	rs4788605	rs5468	rs7202323	rs1424241	rs152828	rs217180	rs8044555	rs152837	rs11643192
6.321e-13	rs2000999	1	2.27e-09	1.957e-07	1.157e-08	4.348e-10	4.667e-11	3.24e-10	1.038e-09	4.742e-10	3.36e-10	4.927e-10	3.47e-10	1.353e-10	1.393e-10	1.659e-12	9.966e-12	1.54e-11	1.609e-12	3.211e-12	1.486e-12	2.83e-13	4.04e-14	6.996e-16	3.297e-15	3.822e-14	6.864e-15	5.16e-15	8.11e-15	5.614e-14	3.241e-14	3.946e-14
1.144e-08	rs4788597	0.0007085	1	8.393e-06	0.0004104	0.005588	9.821e-06	0.0001917	1.187e-06	0.0001441	0.0001013	8.765e-07	0.000102	4.752e-05	7.156e-05	4.743e-06	3.538e-06	5.271e-06	1.052e-06	9.735e-07	2.857e-08	1.876e-07	6.815e-08	1.35e-07	6.165e-08	9.649e-11	3.01e-08	1.666e-08	3.966e-10	7.021e-09	1.999e-08	3.081e-10
5.503e-08	rs10492825	0.9067	4.409e-05	1	0.0001276	1.434e-05	1.22e-05	5.515e-06	0.0001135	5.265e-05	5.393e-06	7.137e-05	4.292e-05	3.315e-06	3.971e-06	2.368e-07	7.213e-06	2.723e-05	5.358e-06	3.54e-07	2.197e-06	4.782e-08	1.17e-07	3.176e-09	2.382e-08	1.031e-07	1.247e-08	3.755e-08	6.257e-08	8.908e-08	2.147e-08	3.617e-08
1.364e-07	rs8060878	0.03102	0.004347	0.0002141	1	0.001304	0.0006329	0.003417	6.528e-05	2.331e-06	0.001007	4.308e-05	1.942e-06	0.0004803	0.0005641	1.962e-05	4.096e-05	1.432e-05	9.538e-06	7.163e-06	2.264e-06	2.988e-06	1.711e-06	9.393e-07	8.44e-07	2.133e-08	6.715e-07	3.221e-09	2.368e-08	1.944e-07	1.438e-08	3.238e-09
6.009e-07	rs3764310	0.007572	0.8774	0.0001516	0.007719	1	0.0005206	0.006091	3.52e-05	0.00258	0.006585	2.721e-05	0.002041	0.003155	0.0028	9.991e-05	0.0001644	0.0001704	8.233e-05	6.03e-05	1.087e-05	1.535e-05	3.228e-06	6.003e-06	3.101e-06	1.824e-09	2.075e-06	1.13e-06	2.35e-08	5.621e-07	1.071e-06	2.506e-08
8.418e-07	rs2335712	0.001116	0.001461	0.0002659	0.01068	0.00132	1	0.004961	1.427e-05	4.372e-06	0.003058	1.155e-05	3.49e-06	0.001901	0.001868	9.742e-05	5.583e-05	9.651e-05	4.92e-05	8.224e-05	4.555e-06	2.595e-05	1.833e-05	8.575e-06	4.156e-06	2.675e-08	4.013e-06	7.227e-09	1.248e-06	1.166e-06	3.695e-08	1.19e-07
6.99e-06	rs12918956	0.07131	0.2129	0.000706	0.6681	0.09316	0.0348	1	0.0006115	0.000525	0.1187	0.000413	0.0004491	0.05924	0.05715	0.0008826	0.004036	0.001714	0.001015	2.637e-05	6.211e-05	6.276e-05	9.235e-05	8.83e-05	4.087e-05	6.036e-10	3.023e-05	1.466e-07	7.264e-07	3.228e-06	1.073e-06	7.768e-11
9.597e-06	rs12928056	0.9143	0.001109	0.02162	0.008343	0.0005906	0.000169	0.0008466	1	0.0008328	0.000661	0.209	0.0007316	0.0004275	0.0004916	0.0001087	0.0002216	0.0007294	0.0003695	0.0002716	0.0002868	1.095e-07	2.606e-07	2.066e-06	5.006e-06	3.34e-05	5.16e-06	5.105e-06	6.647e-06	2.955e-06	1.18e-05	3.063e-06
1.919e-05	rs3213422	0.393	0.6847	0.02195	0.0003112	0.1172	7.583e-05	0.001482	0.001701	1	0.001549	0.001247	1	0.0009567	0.001292	0.0004552	0.007499	0.0118	0.00294	0.000197	9.086e-05	9.505e-05	5.887e-06	3.804e-08	3.571e-06	5.271e-08	6.589e-08	2.582e-05	5.862e-06	5.214e-06	2.007e-05	2.03e-05
1.949e-05	rs9932951	0.3118	0.3712	0.001976	0.4716	0.3945	0.06531	0.4881	0.001369	0.001574	1	0.001042	0.001292	0.212	0.1695	0.001832	0.01216	0.004772	0.003628	0.001465	0.0004302	0.0003223	0.0001528	0.0002244	0.0001078	7.61e-09	6.708e-05	3.266e-07	1.801e-06	1.147e-05	3.521e-06	4.766e-08
2.09e-05	rs12926250	0.9844	0.001807	0.03072	0.01215	0.001008	0.0003016	0.00127	0.756	0.001362	0.00112	1	0.001204	0.0009405	0.001064	0.0002086	0.0004232	0.001236	0.0006924	0.0004964	0.0008275	2.686e-07	5.328e-07	4.635e-06	1.176e-05	6.896e-05	1.354e-05	1.173e-05	1.497e-05	6.737e-06	2.592e-05	7.291e-06
2.776e-05	rs7195958	0.425	0.7341	0.02628	0.0003766	0.1396	8.791e-05	0.001852	0.002186	1	0.001861	0.001612	1	0.001161	0.001634	0.0006256	0.01015	0.01701	0.003987	0.000259	0.0001187	0.0001308	8.588e-06	6.292e-08	5.373e-06	9.932e-08	9.734e-08	3.698e-05	8.716e-06	8.662e-06	2.935e-05	2.929e-05
4.428e-05	rs3852784	0.2252	0.4112	0.002772	0.6754	0.4792	0.1037	0.8265	0.002052	0.002263	0.9778	0.002035	0.001876	1	0.423	0.004151	0.02102	0.00765	0.007634	0.003929	0.0008576	0.0007329	0.0003117	0.0005017	0.0002367	1.15e-08	0.0001699	1.175e-06	5.022e-06	2.707e-05	9.981e-06	8.591e-08
4.96e-05	rs3909541	0.1919	0.5234	0.002957	0.8413	0.2797	0.09942	0.6105	0.002335	0.002659	0.4976	0.002287	0.002309	0.384	1	0.003925	0.02234	0.008077	0.005668	0.001778	0.0003522	0.0005769	0.0005522	0.0005699	0.0002685	9.819e-09	0.0002261	1.768e-06	7.076e-06	2.826e-05	1.156e-05	4.04e-09
0.000225	rs2023929	0.003407	0.06447	0.001161	0.06128	0.04417	0.0221	0.03435	0.001737	0.004314	0.02295	0.001537	0.004067	0.02228	0.01833	1	0.003435	0.003375	0.003378	0.004739	0.0009569	0.002137	0.001113	0.0007951	0.0004785	6.714e-05	0.0003061	0.0002231	0.0003096	0.00032	0.0003463	0.000193
0.0004214	rs3764312	0.1055	0.289	0.1923	0.1741	0.2014	0.0524	0.3272	0.05266	0.3978	0.3097	0.04168	0.3451	0.203	0.222	0.006361	1	0.4188	0.08007	0.02314	0.0076	0.004071	0.000863	1.528e-05	0.0001601	6.357e-10	6.144e-05	0.0001047	8.423e-05	1.185e-05	0.000298	0.0002596
0.0005026	rs11864453	0.2091	0.5983	0.4426	0.08255	0.2453	0.05641	0.1706	0.0444	0.8741	0.1567	0.03314	0.7686	0.1029	0.119	0.009682	0.2348	1	0.1072	0.01445	0.003807	0.005077	0.0009814	1.838e-05	0.0002111	1.179e-07	2.909e-05	0.0002153	0.0003343	6.79e-05	0.0002162	0.0004572
0.001736	rs10492814	0.0649	0.2932	0.2766	0.2366	0.5102	0.1235	0.5096	0.08755	0.5258	0.8252	0.07229	0.4588	0.6089	0.3841	0.02265	0.561	0.6264	1	0.05302	0.03638	0.01603	0.002281	6.902e-05	0.0007795	3.128e-08	0.0007595	0.000387	0.000612	0.0003648	0.001075	0.001481
0.002464	rs3852786	0.1947	0.7106	0.01382	0.3191	0.9438	0.5288	0.01276	0.08253	0.0289	0.423	0.06662	0.02597	0.5212	0.1762	0.06414	0.1382	0.09003	0.08108	1	0.01582	0.06988	0.01006	0.02575	0.0108	1.877e-06	0.006952	0.0003526	0.0008054	0.003662	0.001018	1.404e-06
0.006167	rs4788606	0.2951	0.01627	0.3915	0.194	0.1596	0.03821	0.06651	0.2967	0.03251	0.195	0.4406	0.02899	0.1623	0.05519	0.02082	0.06417	0.05323	0.1497	0.04422	1	0.000192	0.0008495	0.001861	0.003266	0.008407	0.007538	0.003479	0.004252	0.002543	0.005887	0.004413
0.0139	rs4238964	0.05927	0.3498	0.008913	0.6452	0.7838	0.8442	0.1656	0.0001181	0.08048	0.3672	0.0001354	0.07576	0.3623	0.2518	0.1707	0.3684	0.2001	0.1592	0.4825	0.0003907	1	0.103	0.1252	0.0574	4.772e-05	0.04793	0.003946	0.006102	0.01264	0.007091	6.586e-05
0.01405	rs811047	0.003826	0.06593	0.02571	0.8286	0.05599	0.7474	0.309	0.0003369	0.001531	0.1448	0.000319	0.001566	0.1265	0.2241	0.07788	0.01258	0.01579	0.01117	0.06405	0.00189	0.1186	1	0.0683	0.04554	0.01152	0.05269	0.004732	0.02273	0.01641	0.005602	0.0119
0.04311	rs4788605	0.0005606	0.8125	0.002312	0.6716	0.5871	0.5809	0.8843	0.009386	6.005e-05	0.684	0.009688	6.933e-05	0.661	0.723	0.191	0.001511	0.001175	0.001354	0.435	0.01412	0.3613	0.1719	1	0.2179	0.09276	0.04875	0.02487	0.03137	0.01938	0.03024	0.02096
0.05264	rs5468	0.002386	0.5586	0.02343	0.819	0.4199	0.2674	0.5081	0.0264	0.01139	0.412	0.02865	0.01187	0.386	0.4351	0.1136	0.02177	0.02544	0.02397	0.3025	0.02582	0.2509	0.1913	0.2217	1	0.03955	0.1377	0.04085	0.0439	0.05312	0.04277	0.0494
0.05963	rs7202323	0.0245	0.000375	0.07507	0.007827	0.0001369	0.001803	3.278e-06	0.305	0.0001103	1.596e-05	0.2789	0.0001458	1.066e-05	7.557e-06	0.01967	5.573e-08	8.917e-06	7.592e-07	4.646e-05	0.09022	0.0001868	0.03096	0.1205	0.0474	1	0.08883	0.0855	0.07768	9.678e-05	0.07409	0.005809
0.2755	rs1424241	0.006881	0.8184	0.02126	0.4192	0.5433	0.7364	0.6288	0.1058	0.0006346	0.4104	0.1148	0.0006474	0.4754	0.7621	0.619	0.02101	0.01155	0.06713	0.995	0.3068	0.9302	0.5097	0.247	0.7909	0.422	1	0.1813	0.2101	0.1879	0.2183	0.2596
0.2781	rs152828	0.01257	0.4762	0.1327	0.00314	0.9365	0.001197	0.003269	0.1198	0.422	0.002617	0.1285	0.4153	0.004316	0.006091	0.2726	0.05993	0.0918	0.04611	0.02928	0.1358	0.06527	0.08963	0.1361	0.1987	0.4258	0.1769	1	0.2106	0.2142	0.4404	0.2285
0.3327	rs217180	0.02367	0.005999	0.3103	0.04126	0.007062	0.8443	0.02104	0.1953	0.072	0.01869	0.2047	0.07456	0.02366	0.02752	0.5556	0.0221	0.1905	0.08939	0.08364	0.2026	0.1221	0.9118	0.2144	0.2579	0.4625	0.2035	0.2488	1	0.2703	0.257	0.2964
0.4112	rs8044555	0.3064	0.1939	0.8714	0.8064	0.3561	0.6655	0.1386	0.08495	0.0737	0.1896	0.09022	0.08701	0.2002	0.1891	0.8453	0.007105	0.03493	0.05821	0.8943	0.1296	0.3407	0.6889	0.1603	0.3946	0.0004584	0.3068	0.3072	0.3291	1	0.36	0.4361
0.4913	rs152837	0.07895	0.5372	0.1458	0.01941	0.9885	0.01296	0.03604	0.3229	0.4098	0.04251	0.3351	0.4189	0.05795	0.06116	0.7961	0.2374	0.1691	0.2038	0.13	0.3533	0.206	0.2353	0.2906	0.3574	0.615	0.3622	0.8868	0.4135	0.4275	1	0.4392
0.7817	rs11643192	0.2932	0.007357	0.2711	0.006623	0.01226	0.04737	2.412e-06	0.1293	0.9438	0.0006306	0.1452	0.9257	0.0005046	1.956e-05	0.5095	0.3264	0.6049	0.5331	0.0001609	0.4041	0.001592	0.5326	0.259	0.6674	0.04101	0.7292	0.5528	0.6314	0.9236	0.639	1
